# Supplementary material for: Doubly thermo-responsive copolymers in ionic liquid
Source: Royal Society of Chemistry journal article supplement (doi:10.1039/c5sm03063c), 2016-01-01
Supplement: c5sm03063c1.pdf [file c5sm03063c1.pdf]

## Doubly thermo-responsive copolymers in ionic liquid

H. H. Nguyen,<sup>a</sup> M. El Ezzi,<sup>a</sup> C. Mingotaud,<sup>a</sup> M. Destarac,<sup>a</sup> J.-D. Marty<sup>a</sup> and N. Lauth-de Viguier<sup>a,\*</sup>

<sup>a</sup> IMRCP Laboratory, University of Toulouse, CNRS UMR 5623, 118 route de Narbonne, 31062 Toulouse, France.

\*corresponding authors: [viguier@chimie.ups-tlse.fr](mailto:viguier@chimie.ups-tlse.fr)

### Contents

#### 1. Synthesis of block copolymers

- 1a. Synthesis of PBA-*b*-PNIPAM diblock copolymers (Series C1).
- 1.b. Synthesis of PBA-*b*-P(NIPAM-*stat*-NtBuAM) diblock copolymers (series C2 and C3).

#### 2. Size Exclusion Chromatography (SEC)

#### 3. Viscosity measurements of [C<sub>2</sub>mim][NTf<sub>2</sub>]

#### 4. Phase transition temperatures

- 4.a. Phase transition temperatures of PNIPAM homopolymers
- 4.b. Phase transition temperatures of PBA homopolymers
- 4.c. Phase transition temperatures of block copolymers

#### 5. Size of aggregates in IL

- 5.a. Analysis by DLS
- 5.b. Analysis by Cryo-Scanning Electron Microscopy (Cryo-SEM)

## 1. Synthesis of block copolymers

**Table S1.** Theoretical weight fractions ( $\omega$ ) of each block in the copolymers.

| notation                 | C1 PBA- <i>b</i> -PNIPAM |       |       | C2 PBA- <i>b</i> -P(NIPAM <sub>82%</sub> - <i>stat</i> -NtBuAM <sub>18%</sub> ) |       |       | C3 PBA- <i>b</i> -P(NIPAM <sub>60%</sub> - <i>stat</i> -NtBuAM <sub>40%</sub> ) |       |       |
|--------------------------|--------------------------|-------|-------|---------------------------------------------------------------------------------|-------|-------|---------------------------------------------------------------------------------|-------|-------|
|                          | 2k/8k                    | 5k/5k | 8k/2k | 2k/8k                                                                           | 5k/5k | 8k/2k | 2k/8k                                                                           | 5k/5k | 8k/2k |
| $\omega_{\text{PBA}}$    | 0.2                      | 0.5   | 0.8   | 0.2                                                                             | 0.5   | 0.8   | 0.2                                                                             | 0.5   | 0.8   |
| $\omega_{\text{PNIPAM}}$ | 0.8                      | 0.5   | 0.2   | 0.66                                                                            | 0.412 | 0.165 | 0.474                                                                           | 0.296 | 0.118 |
| $\omega_{\text{PtBuAM}}$ | 0                        | 0     | 0     | 0.14                                                                            | 0.088 | 0.035 | 0.326                                                                           | 0.204 | 0.082 |

### 1a. Synthesis of PBA-*b*-PNIPAM diblock copolymers (Series C1).

Copolymers of BA and NIPAM (Series C1) were synthesized and characterized according to previously reported procedures.<sup>21</sup>

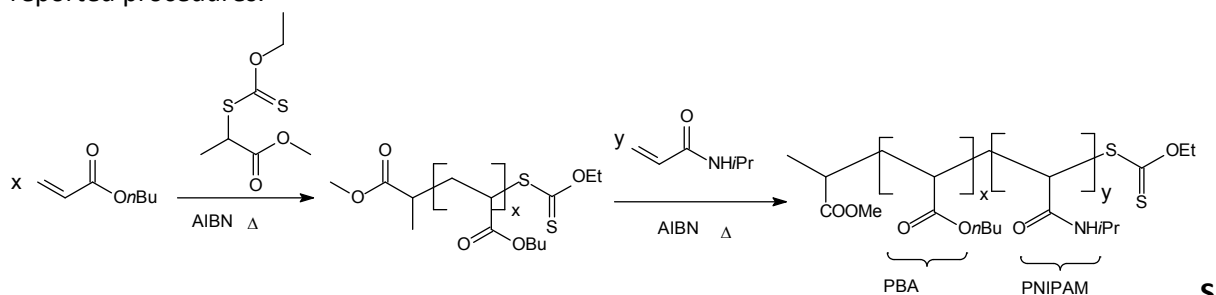

**cheme S1.** Synthesis of poly(*n*-butyl acrylate)-*b*-poly(*N*-isopropyl acrylamide), PBA-*b*-PNIPAM by RAFT/MADIX polymerisation with theoretical  $\bar{M}_n = 10000 \text{ g}\cdot\text{mol}^{-1}$ .

**Table S2.** Experimental conditions and polymerisation results for the synthesis of diblock copolymers (series C1)

| Copolymers                                            | $m_{\text{AIBN}}$<br>(g) | $m_{\text{xanthate}}$<br>(g) | $m_{\text{BA}}$<br>(g) | $m_{\text{PBA}}$<br>(g) | $m_{\text{NIPAM}}$<br>(g) | $m_{\text{ethanol}}$<br>(g) | Conv.<br>% | $\bar{M}_n$<br>g·mol <sup>-1</sup><br><sub>a</sub> | $\bar{D}$ |
|-------------------------------------------------------|--------------------------|------------------------------|------------------------|-------------------------|---------------------------|-----------------------------|------------|----------------------------------------------------|-----------|
| PBA <sub>2k</sub>                                     | 0.051                    | 0.521                        | 4.994                  |                         |                           | 3.39                        | 98.2       | 2200                                               | 1.19      |
| C1 PBA <sub>2k</sub> - <i>b</i> -PNIPAM <sub>8k</sub> | 0.187                    |                              |                        | 3.873                   | 15.556                    | 16.446                      | 100        | 10050                                              | 1.16      |
| PBA <sub>5k</sub>                                     | 0.051                    | 0.214                        | 4.931                  |                         |                           | 2.235                       | 98.3       | 5600                                               | 1.24      |
| C1 PBA <sub>5k</sub> - <i>b</i> -PNIPAM <sub>5k</sub> | 0.056                    |                              |                        | 1.545                   | 1.546                     | 2.413                       | 100        | 9400                                               | 1.25      |
| PBA <sub>8k</sub>                                     | 0.076                    | 0.208                        | 7.799                  |                         |                           | 3.586                       | 98.9       | 9150                                               | 1.21      |
| C1 PBA <sub>8k</sub> - <i>b</i> -PNIPAM <sub>2k</sub> | 0.192                    |                              |                        | 4.001                   | 1.076                     | 3.615                       | 100        | 10100                                              | 1.20      |

<sup>a</sup> SEC in THF with RI-MALS detection, 10 mg/mL, 1 mL/min

### 1. b. Synthesis of PBA-*b*-P(NIPAM-*stat*-NtBuAM) diblock copolymers (series C2 and C3).

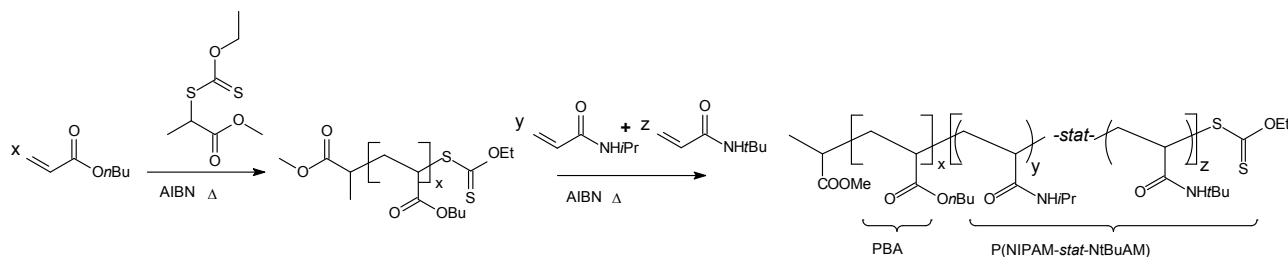

**Scheme S2.** Synthesis of poly(*n*-butyl acrylate)-*b*-poly(*N*-isopropyl acrylamide-*stat*-*N*-tert-butylacrylamide), PBA-*b*-P(NIPAM-*stat*-NtBuAM) by MADIX polymerisation with theoretical  $\bar{M}_n = 10000 \text{ g}\cdot\text{mol}^{-1}$ . Series C2: (w/w) ratio of NIPAM/NtBuAM = 82/18 Series C3: (w/w) ratio of NIPAM/NtBuAM = 40/60

**Table S3.** Experimental conditions and polymerisation results for the synthesis of modified block copolymers (series C2 and C3).

| Copolymers                                                                                                           | $m_{\text{AIBN}}$<br>(g) | $m_{\text{xanthate}}$<br>(g) | $m_{\text{BA}}$<br>(g) | $m_{\text{PBA}}$<br>(g) | $m_{\text{NIPAM}}$<br>(g) | $m_{\text{N-tBuAA}}$<br>(g) | $m_{\text{ethanol}}$<br>(g) | Conv.<br>(%) | $\bar{M}_n$<br><sup>a</sup><br>$\text{g}\cdot\text{mol}^{-1}$ | $\bar{D}$ |
|----------------------------------------------------------------------------------------------------------------------|--------------------------|------------------------------|------------------------|-------------------------|---------------------------|-----------------------------|-----------------------------|--------------|---------------------------------------------------------------|-----------|
| PBA <sub>2k</sub>                                                                                                    | 0.052                    | 0.531                        | 5.105                  |                         |                           |                             | 2.450                       | 99           | 2100                                                          | 1.20      |
| C2 PBA <sub>2k</sub> - <i>b</i> -<br>P(NIPAM <sub>82%</sub> - <i>stat</i> -<br>NtBuAM <sub>18%</sub> ) <sub>8k</sub> | 0.098                    |                              |                        | 2.974                   | 6.585                     | 1.433                       | 9.605                       | 100          | 9950                                                          | 1.33      |
| PBA <sub>5k</sub>                                                                                                    | 0.055                    | 0.266                        | 6.419                  |                         |                           |                             | 3.068                       | 98           | 5400                                                          | 1.22      |
| C2 PBA <sub>5k</sub> - <i>b</i> -<br>P(NIPAM <sub>82%</sub> - <i>stat</i> -<br>NtBuAM <sub>18%</sub> ) <sub>5k</sub> | 0.194                    |                              |                        | 5.810                   | 3.300                     | 0.724                       | 6.825                       | 100          | 10000                                                         | 1.18      |
| PBA <sub>8k</sub>                                                                                                    | 0.105                    | 0.338                        | 12.78                  |                         |                           |                             | 7.160                       | 99           | 8700                                                          | 1.23      |
| C2 PBA <sub>8k</sub> - <i>b</i> -<br>P(NIPAM <sub>82%</sub> - <i>stat</i> -<br>NtBuAM <sub>18%</sub> ) <sub>2k</sub> | 0.384                    |                              |                        | 12.21                   | 1.648                     | 0.407                       | 14.645                      | 100          | 9700                                                          | 1.27      |
| PBA <sub>2k</sub>                                                                                                    | 0.052                    | 0.537                        | 5.165                  |                         |                           |                             | 2.247                       | 98.4         | 2200                                                          | 1.19      |
| C3 PBA <sub>2k</sub> - <i>b</i> -<br>P(NIPAM <sub>60%</sub> - <i>stat</i> -<br>NtBuAM <sub>40%</sub> ) <sub>2k</sub> | 0.096                    |                              |                        | 2.000                   | 4.755                     | 3.265                       | 8.962                       | 100          | 12700                                                         | 1.16      |
| PBA <sub>5k</sub>                                                                                                    | 0.052                    | 0.232                        | 5.351                  |                         |                           |                             | 2.562                       | 98.7         | 5100                                                          | 1.23      |
| C3 PBA <sub>5k</sub> - <i>b</i> -<br>P(NIPAM <sub>60%</sub> - <i>stat</i> -<br>NtBuAM <sub>40%</sub> ) <sub>5k</sub> | 0.192                    |                              |                        | 3.999                   | 2.372                     | 1.647                       | 7.826                       | 100          | 10250                                                         | 1.21      |
| PBA <sub>8k</sub>                                                                                                    | 0.110                    | 0.268                        | 10.02                  |                         |                           |                             | 4.797                       | 99.4         | 7900                                                          | 1.21      |
| C3 PBA <sub>8k</sub> - <i>b</i> -<br>P(NIPAM <sub>60%</sub> - <i>stat</i> -<br>NtBuAM <sub>40%</sub> ) <sub>2k</sub> | 0.385                    |                              |                        | 2.001                   | 1.186                     | 0.815                       | 7.131                       | 100          | 8600                                                          | 1.23      |

<sup>a</sup> SEC in THF with RI-MALS detection, 10 mg/mL, 1 mL/min

## 2. Size Exclusion Chromatography (SEC)

$dn/dc$  of P(A/B) diblock copolymers was calculated according to the following equation 1:

$$dn/dc_{(A/B)} = W_A \cdot (dn/dc)_A + W_B \cdot (dn/dc)_B \quad (\text{Eq. 1})$$

where  $W_A$  and  $W_B$  are the mass fractions of blocks A and B in the copolymer, respectively.  $(dn/dc)_{PBA} = 0.065 \text{ mL}\cdot\text{g}^{-1}$  (S. Podzimek, M. Kaska, J. Snuparek, *Macromol. Symp.* **2000**, *151*, 543-548) and  $(dn/dc)_{PNIPAm} = 0.107 \text{ mL}\cdot\text{g}^{-1}$  (S. Zhou, S. Fan, S.C.F. Au-Yeung, C. Wu, *Polymer* **1995**, *7*, 1341-1346).

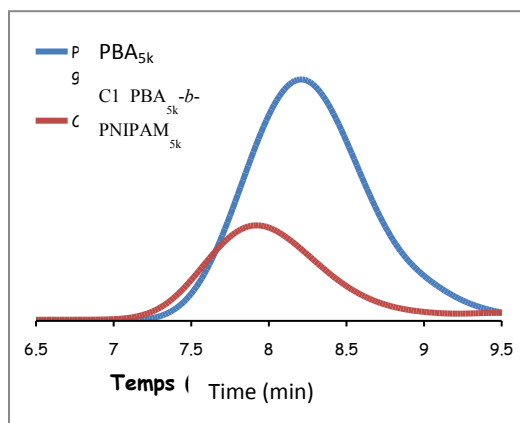

**Figure S1.** Size exclusion chromatograms (RI response) in THF of PBA<sub>5k</sub> and of PBA<sub>5k</sub>-b-PNIPAM<sub>5k</sub>

## 3. Viscosity measurements of [C<sub>2</sub>mim][NTf<sub>2</sub>]

Viscosity was measured on an Advanced Rheometer TA Instruments type AR1000 with thermostatic control. The analysis was performed by using a cone-plan geometry with a diameter of 60 mm and a truncation of 61  $\mu\text{m}$  with a  $1^\circ 59' 54''$  angle. The velocity gradient was between 0.5 and 1000  $\text{s}^{-1}$ .

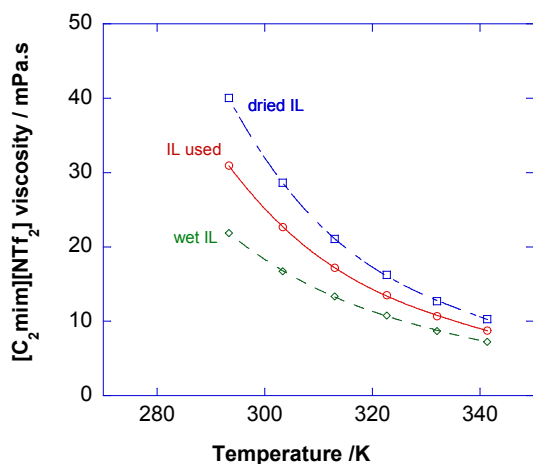

**Figure S2.** Viscosity of [C<sub>2</sub>mim][NTf<sub>2</sub>] versus temperature. Dried IL under reduce pressure at 50°C for 24 h with constant stirring: 14.5 ppm, wet IL (saturated in water): 15300 ppm, used IL (commercial without supplementary drying): 3575 ppm of water.

#### 4.c. Phase transition temperatures of PNIPAM homopolymers

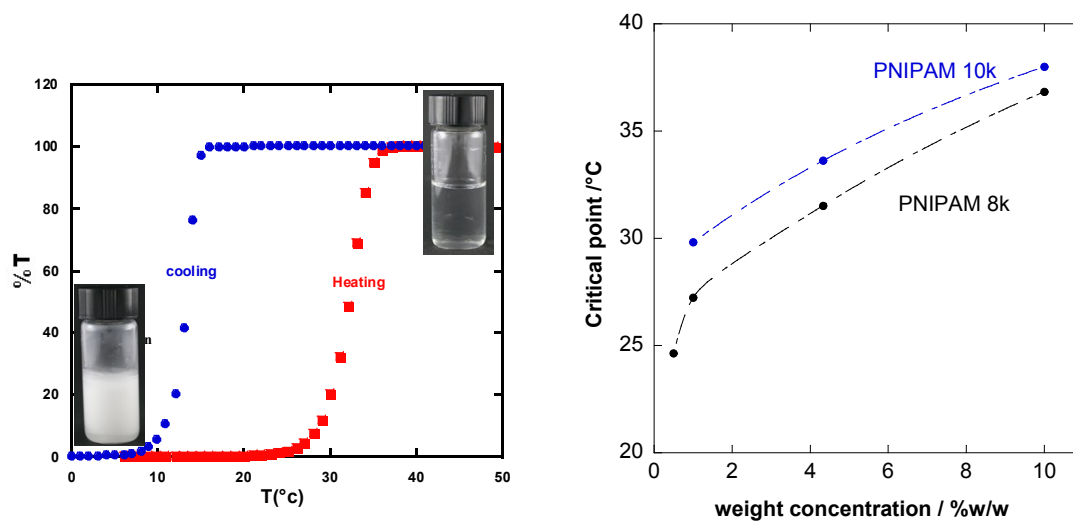

**Figure S3.** (A) Turbidity curves for PNIPAM 8k in [C<sub>2</sub>mim][NTf<sub>2</sub>] at a concentration of 1.0 wt.% with cooling and heating rates at 5°C/min. (B) Clarification point for PNIPAM 8k and 10k in [C<sub>2</sub>mim][NTf<sub>2</sub>] as a function of polymer concentrations (0.5, 1, 4.3, 10%). These points were calculated by the extrapolation to 0°C/min of the transition temperatures obtained from the inflection point of transmittance vs temperature curves measured at different rates.

#### 4.d. Phase transition temperatures of PBA homopolymers

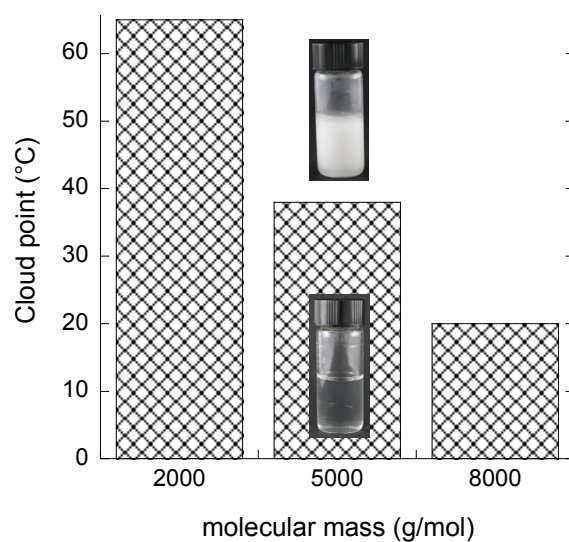

**Figure S4.** Cloud points determined by DLS measurements for PBA2k, 5k and 8k homopolymers in IL (1wt.%) on heating and cooling processes.

#### 4.e. Phase transition temperatures of block copolymers

Table S4. Transition temperatures of PBA-*b*-PNIPAM and PBA-*b*-P(NIPAM-*stat*-NtBuAM) copolymer solutions in [C<sub>2</sub>mim][NTf<sub>2</sub>] (with 3575 ppm of water ) at a concentration of 1.0 wt.%. Determination of Critical Points by turbidimetry: Transmittance of copolymer solutions was recorded with a Cary spectrophotometer with increasing temperature (from 0 to 50°C) at different heating rates (0.2, 0.5, 1, 2, 5°C/min). The transition temperature were then calculated by the extrapolation to 0 °C/min of the transition temperatures obtained from the inflection point of each transmittance curve.

| Series | copolymer | Transition temperature (°C)        | by turbidimetry |            | by DLS    |
|--------|-----------|------------------------------------|-----------------|------------|-----------|
|        |           |                                    | On heating      | On cooling |           |
| C1     | 2/8       | Clarification point<br>Cloud point | 31.3            | 30.7       | 26<br>>65 |
|        | 5/5       | Clarification point<br>Cloud point | 18.8            | 17.2       | 16<br>53  |
|        | 8/2       | Clarification point<br>Cloud point | 7.5             | 29.5       | 7.5<br>38 |
| C2     | 2/8       | Clarification point                | 27              | 25.2       | 25        |
|        | 5/5       | Clarification point<br>Cloud point | 16.5            | 15.7       | 16<br>51  |
|        | 8/2       | Clarification point<br>Cloud point | 30.2            | 31.9       | 9<br>30   |
| C3     | 2/8       | Clarification point<br>Cloud point | 28.8            | 28.4       | 31        |
|        | 5/5       | Clarification point<br>Cloud point | 22.7            | 21.7       | 26<br>56  |
|        | 8/2       | Clarification point<br>Cloud point | 28.2            | 25.2       | 7<br>63   |

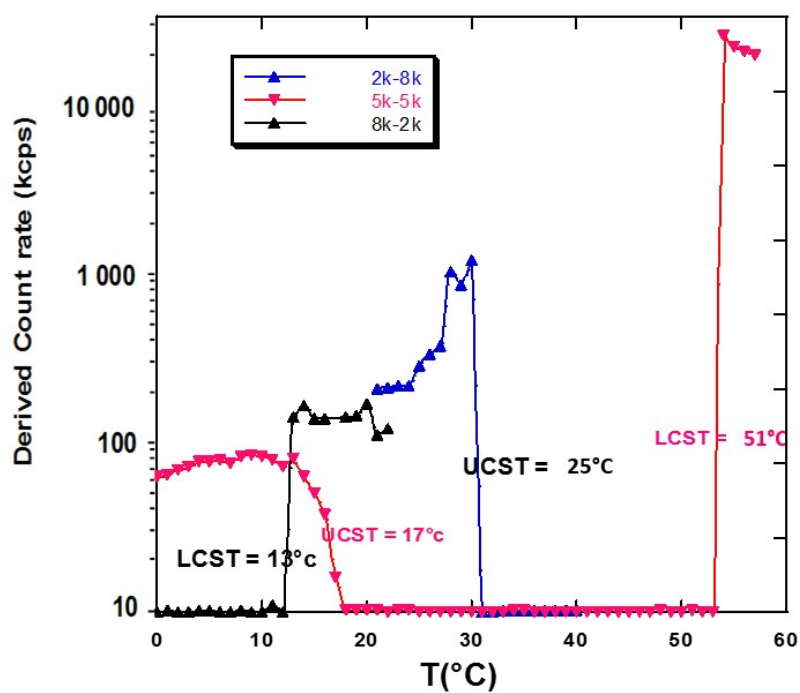

**Figure S5.** Temperature dependence of the derived count rate of the scattered light for C2 PBA-*b*-P(NIPAM-*stat*-NtBuAM) polymer solutions in [C<sub>2</sub>mim][NTf<sub>2</sub>] at a concentration of 1.0 wt.%.

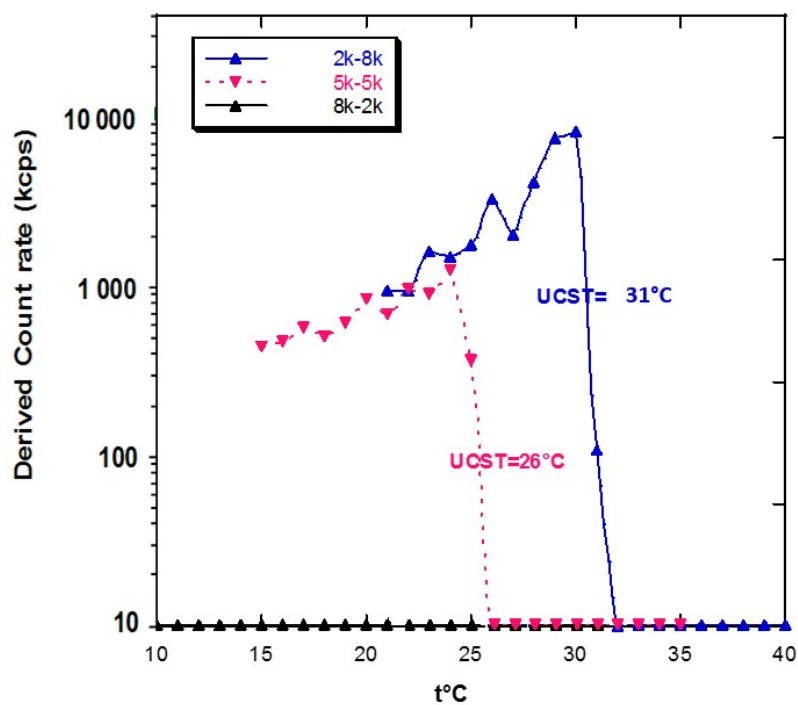

**Figure S6.** Temperature dependence of the derived count rate of the scattered light for C3 PBA-*b*-P(NIPAM-*stat*-NtBuAM) polymer solutions in [C<sub>2</sub>mim][NTf<sub>2</sub>] at a concentration of 1.0 wt.%.

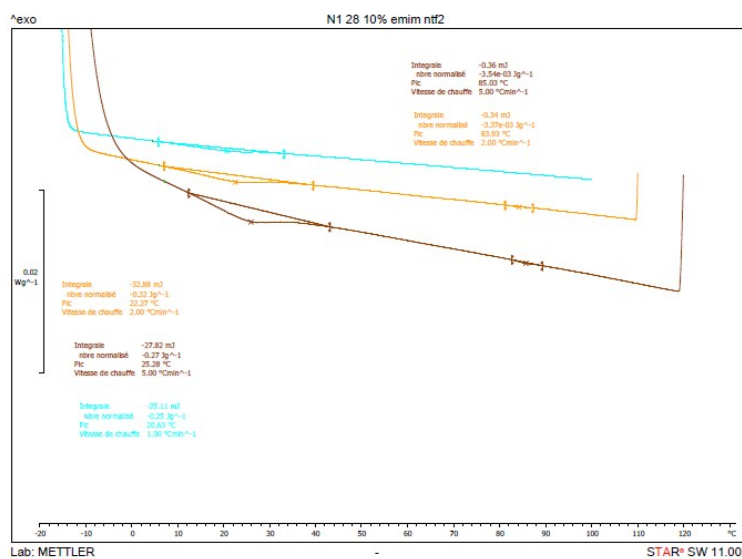

**Figure S7.** DSC thermogram for C1 2/8 PBA-*b*-PNIPAM polymer solutions in [C<sub>2</sub>mim][NTf<sub>2</sub>] at a concentration of 10 wt.% at 1, 2 and 5°C/min. (Temperature of transitions: 20.26°C and 83.20°C)

## 5. Size of aggregates in IL

### 5.a. Analysis by DLS

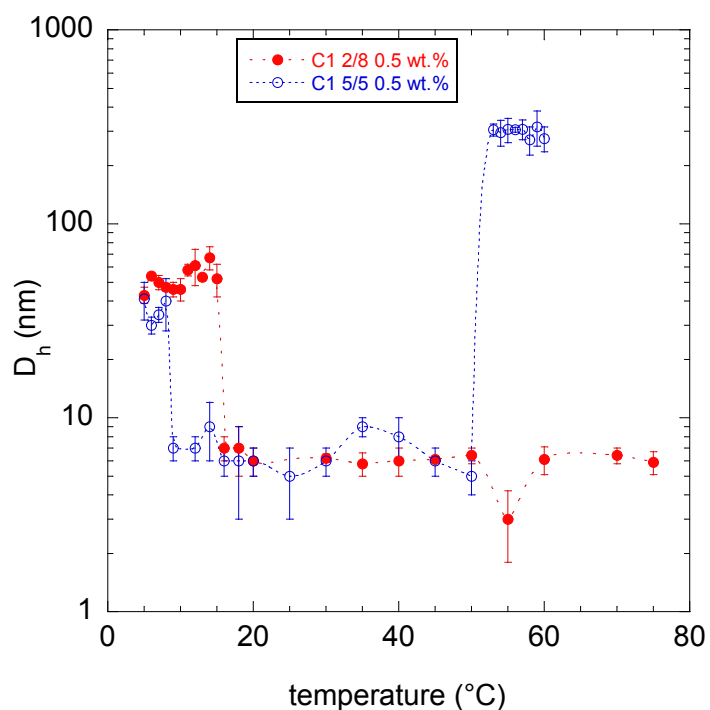

**Figure S8.** Mean hydrodynamic diameter ( $D_h$ ) obtained from DLS measurements for a 0.5 wt.% solutions of C1 2/8 and of C1 5/5 in function of temperature.



### 5.b. Analysis by Cryo-Scanning Electron Microscopy (Cryo-SEM)

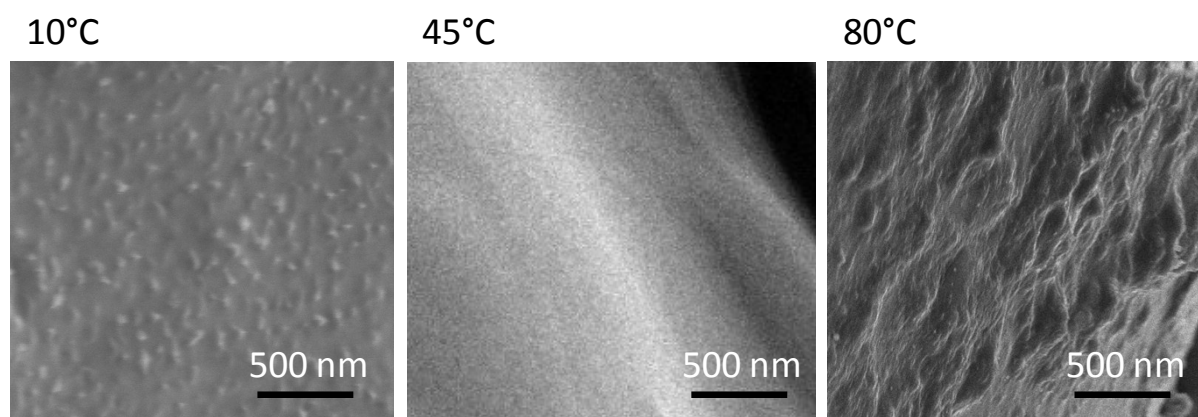

**Figure S9.** Cryo-SEM images of PBA-b-PNIPAM C1 5/5 at three different temperatures (10°C, 45°C and 80°C)
